# Supplementary material for: Efficient surface functionalization of detonation nanodiamond using ozone under ambient conditions
Source: Royal Society of Chemistry journal article supplement (doi:10.1039/c9nr01716j), 2019-01-01
Supplement: c9nr01716j1.pdf [file c9nr01716j1.pdf]

## Efficient surface functionalization of detonation nanodiamond using ozone under ambient conditions

Johannes Ackermann,<sup>a</sup> Anke Krueger<sup>a,b\*</sup>

<sup>a</sup> Institute for Organic Chemistry, Julius-Maximilians University Würzburg, Am Hubland, D-97074 Würzburg, Germany, <sup>b</sup> Wilhelm Conrad Röntgen Center for Complex Materials Systems (RCCM), Julius-Maximilians University Würzburg, Am Hubland, D-97074 Würzburg, Germany

\*anke.krueger@uni-wuerzburg.de

### Supporting information

Raman spectra:

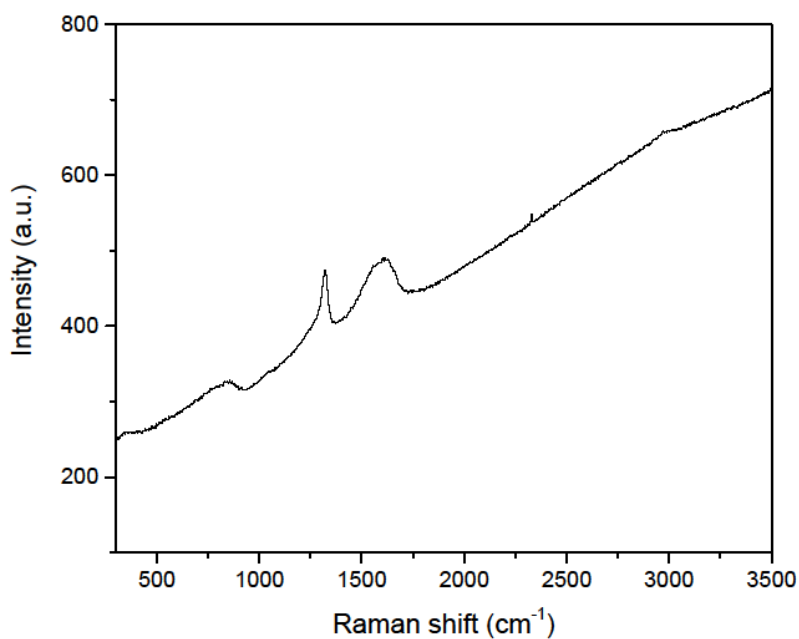

Fig. S1 Raman spectrum of DND

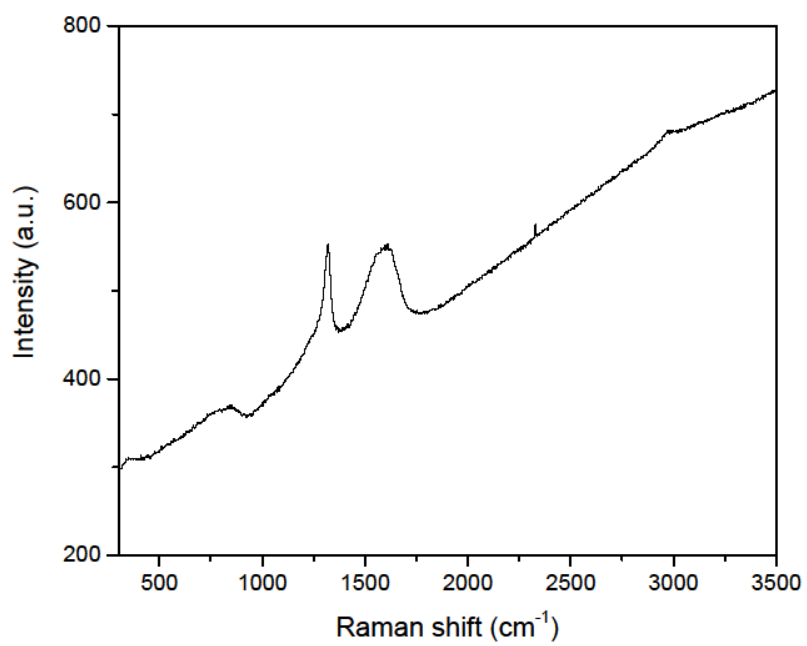

Fig. S2 Raman spectrum of DNDox

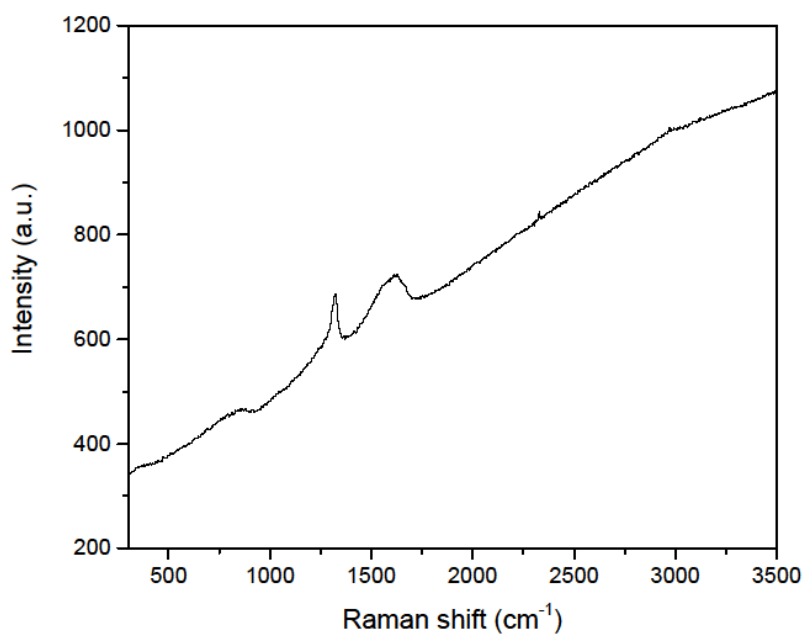

Fig. S3 Raman spectrum of DNDred

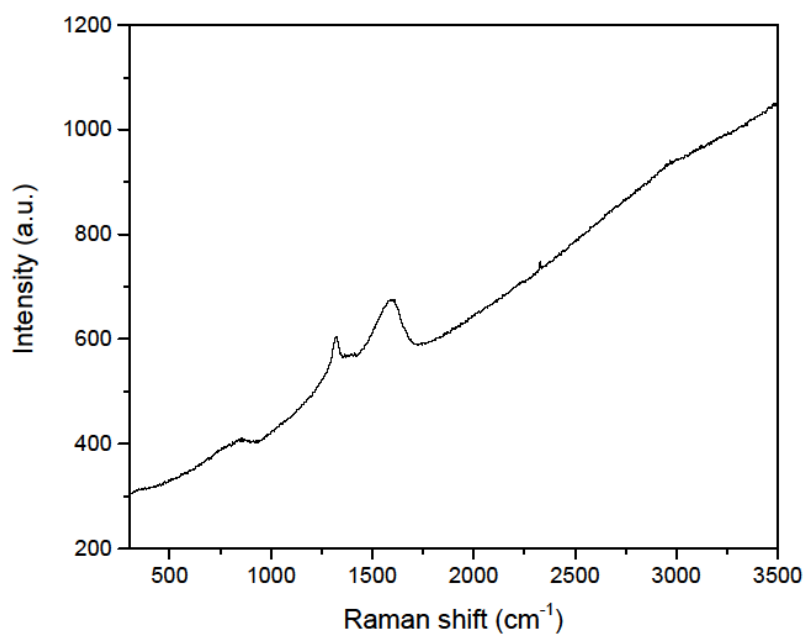

Fig. S4 Raman spectrum of aDND

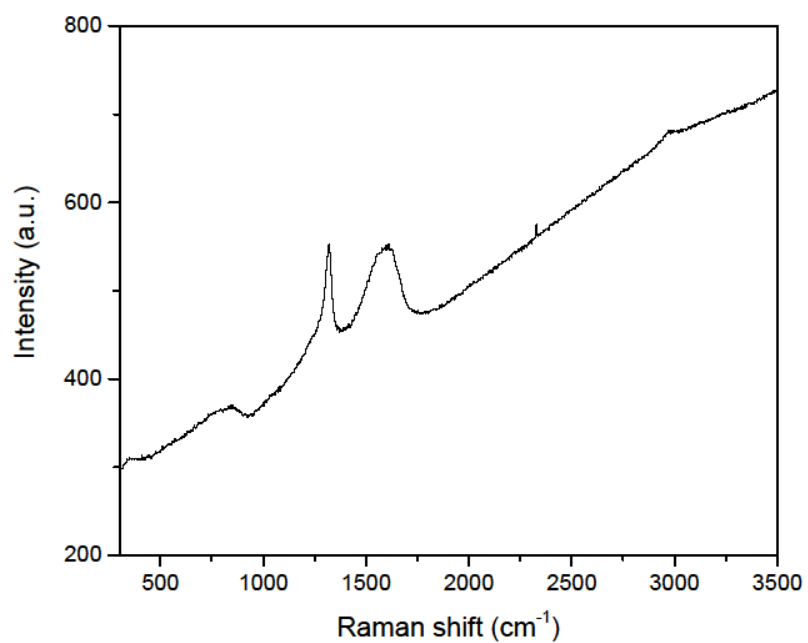

Fig. S5 Raman spectrum of aDNDox

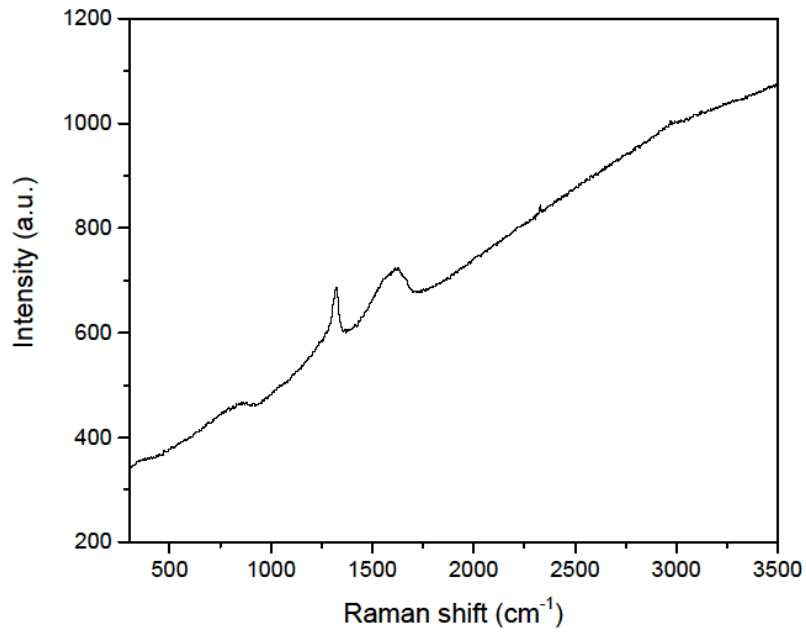

Fig. S6 Raman spectrum of aDNDred

XRD spectra:

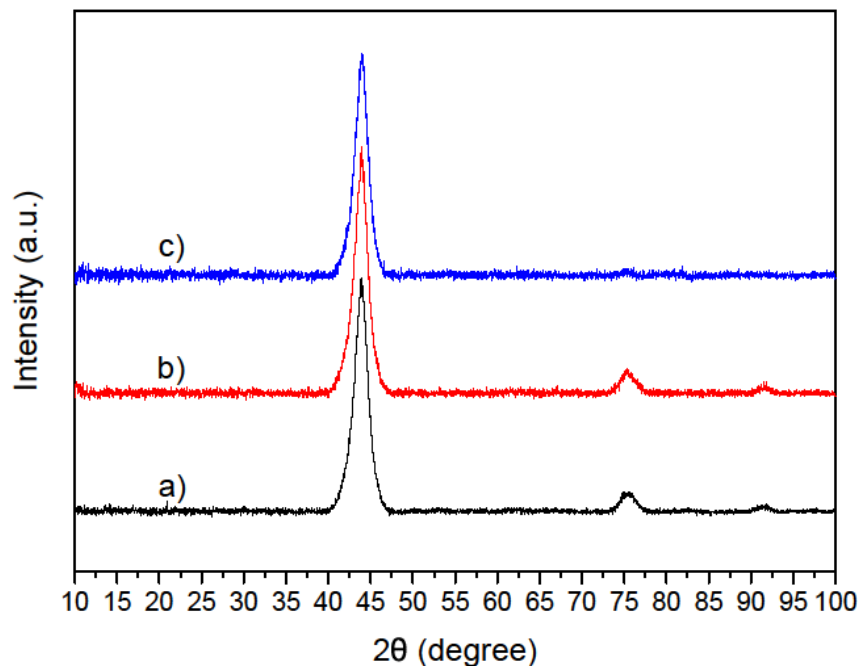

Fig. S7 XRD spectra of a) untreated DND b) DND treated with ozone and oxidized with H<sub>2</sub>O<sub>2</sub> c) DND treated with ozone and reduced with NaBH<sub>4</sub>

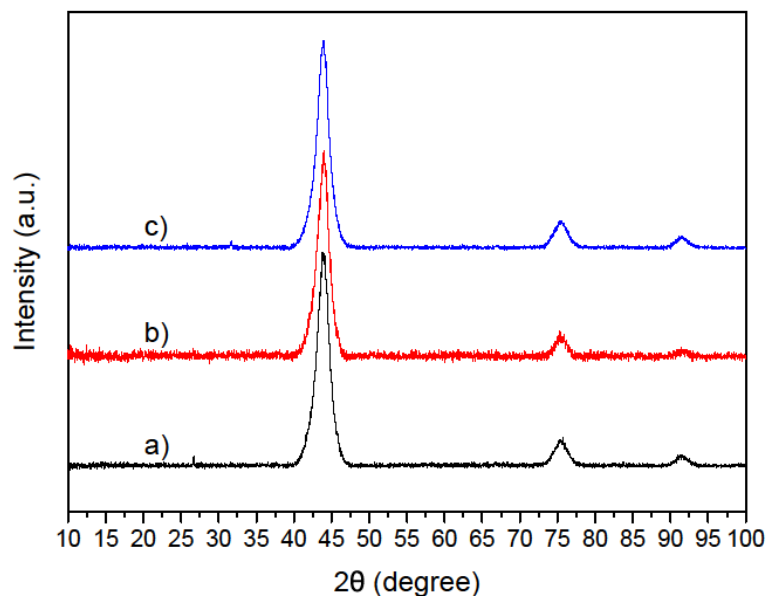

Fig. S8 XRD spectra of a) untreated aDND b) aDND treated with ozone and oxidized with  $H_2O_2$  c) aDND treated with ozone and reduced with  $NaBH_4$

### FTIR spectra of diamond materials between $1500$ and $1800\text{ cm}^{-1}$

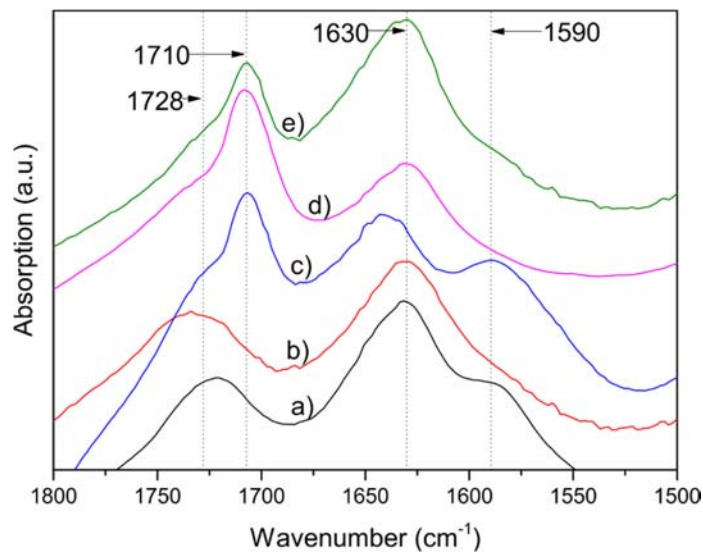

Fig. S9. Magnified FTIR spectra of a) untreated DND b) DND treated with ozone over a period of six hours c) DND treated with ozone for 6 h and oxidation with hydrogen peroxide d) DND treated with ozone for 6 h, oxidation with hydrogen peroxide and washing with dilute hydrochloric acid e) DND treated with ozone for 6 h, reduction with sodium borohydride and washing with dilute hydrochloric acid.

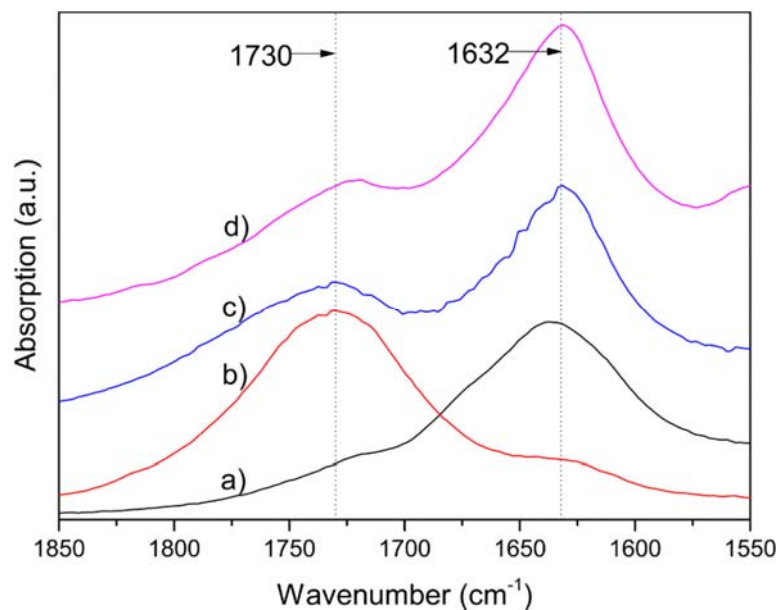

**Fig. S10.** FT-IR spectra of a) untreated aDND b) aDND treated with ozone over a period of six hours c) aDND treated with ozone for 6 h, oxidation with hydrogen peroxide and washing with dilute hydrochloric acid d) aDND treated with ozone for 6 h, reduction with sodium borohydride and washing with dilute hydrochloric acid.

IR spectra of DND submitted to workup treatment without prior ozonization

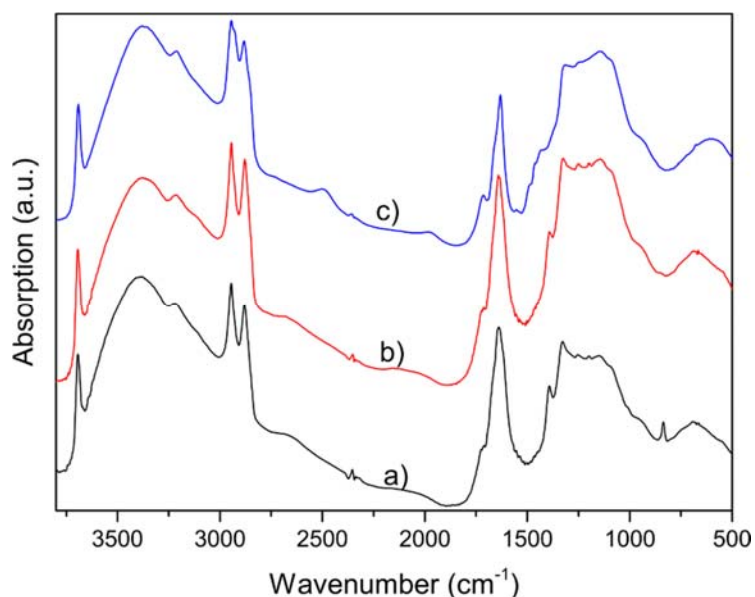

**Fig. S11.** IR spectra of a) annealed aDND; b) aDND treated with NaBH<sub>4</sub> and subsequent washing with dilute HCl; c) aDND treated with H<sub>2</sub>O<sub>2</sub> and washed with dilute HCl.

## Determination of required reaction time

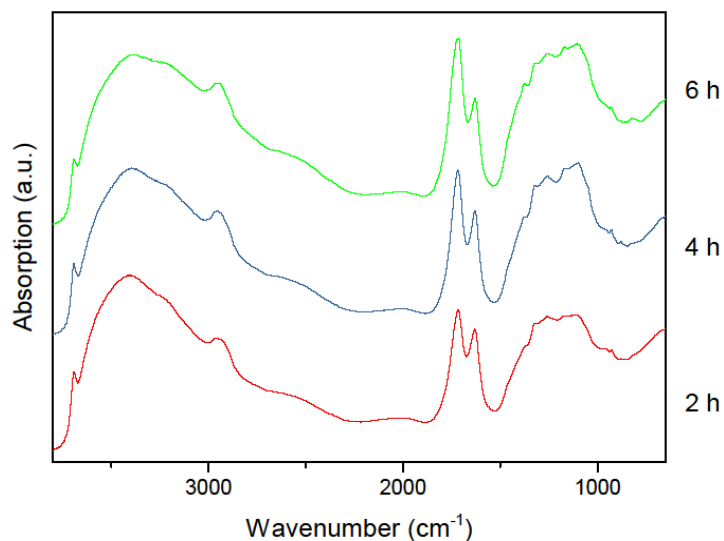

Fig. S12: IR spectra of ozone treated DND after different reaction times for ozonolysis under ambient conditions.

## Estimation of the number of surface groups from Boehm titration results

**Table S1.** Number of surface groups for untreated DND, DND after ozonolysis and oxidative workup and DND after ozonolysis and reductive workup

| Sample | carboxylic (sites per nm <sup>2</sup> ) | lactonic (sites per nm <sup>2</sup> ) | phenolic (sites per nm <sup>2</sup> ) |
|--------|-----------------------------------------|---------------------------------------|---------------------------------------|
| DND    | 0,42                                    | 0,07                                  | 0,01                                  |
| DNDox  | 0,39                                    | 0,07                                  | 0,09                                  |
| DNDred | 0,34                                    | 0,02                                  | 0,003                                 |

**Table S2.** Number of surface groups for thermally annealed aDND, aDND after ozonolysis and oxidative workup and aDND after ozonolysis and reductive workup

| Sample  | carboxylic (sites per nm <sup>2</sup> ) | lactonic (sites per nm <sup>2</sup> ) | phenolic (sites per nm <sup>2</sup> ) |
|---------|-----------------------------------------|---------------------------------------|---------------------------------------|
| aDND    | 0,09                                    | 0,02                                  | 0,005                                 |
| aDNDox  | 0,38                                    | 0,04                                  | 0,04                                  |
| aDNDred | 0,35                                    | 0,04                                  | 0,02                                  |

The estimation has been carried out following the example below according to ref. 20:

$$1. \text{ COOH Sites} = \frac{n_{\text{COOH}} * N_A}{m_{\text{DND}} * S_{\text{BET}} * 10^{18}}$$

e.g. for untreated DND:

$$n_{\text{COOH}} = 0,000246 \text{ mol}$$

$$N_A = 6,02 \times 10^{23} \text{ mol}^{-1}$$

$$m_{\text{DND}} = 1 \text{ g}$$

$S_{\text{BET}} = 350 \text{ m}^2/\text{g}$  from BET isotherm (and assumed to be unchanged after ozonolysis)

→ 0,42 sites per  $\text{nm}^2$

Reference [20] from main article:

L. Schmidlin, V. Pichot, M. Comet, S. Josset, P. Rabu, and D. Spitzer, *Diamond Relat. Mater.*, 2012, **22**, 113-117.
